# Supplementary material for: Field-induced inversion of chirality in SmCPAphases of new achiral bent-core mesogens
Source: Royal Society of Chemistry journal article supplement (doi:10.1039/b415513k), 2005-01-01
Supplement: b415513k.pdf [file b415513k.pdf]

## Field-induced inversion of chirality in $\text{SmCP}_A$ phases of new achiral bent-core mesogens

Wolfgang Weissflog,<sup>\*a</sup> Ulrike Dunemann,<sup>a</sup> Martin W. Schröder,<sup>a</sup> Siegmar Diele,<sup>a</sup> Gerhard Pelzl,<sup>a</sup> Horst Kresse,<sup>a</sup> and Siegbert Grande<sup>b</sup>

a Institut für Physikalische Chemie, Martin-Luther-Universität Halle-Wittenberg, Mühlpforte 1, 06108 Halle (Saale), Germany

b Institut für Experimentelle Physik I, Fakultät für Physik und Geowissenschaften, Universität Leipzig, Linnéstraße 5, 04103 Leipzig, Germany

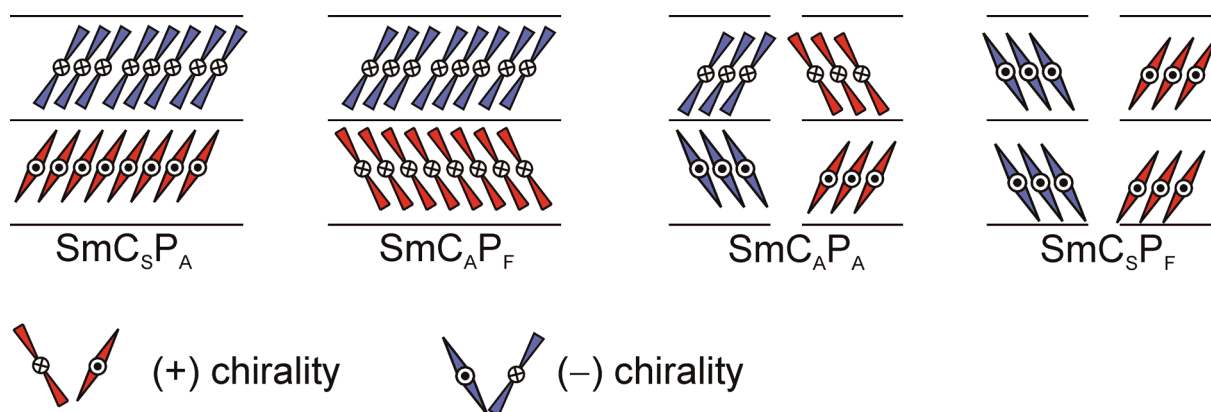

**Fig. S1 (ESI)** Schematic representation of the organisation of bent-core molecules in adjacent layers of tilted polar smectic phases (SmCP).

The smectic layers are perpendicular to the drawing plane. The subscripts S and A after C designate synclinal and anticlinal interlayer correlation, respectively. The subscripts A and F after P indicate whether the SmCP is antiferroelectric or ferroelectric. The symbols (⊙ and ⊗) correspond to opposite bent direction of the molecules, that means, to opposite polar axes. Different colours (blue or red) of the molecule symbols indicate different layer chirality.
